# Supplementary material for: Crystallization of zeolite Beta in the presence of an anionic surfactant AESA
Source: Royal Society of Chemistry journal article supplement (doi:10.1039/d2dt02110b), 2022-01-01
Supplement: d2dt02110b1.pdf [file d2dt02110b1.pdf]

## Supplementary Information

# Crystallization of zeolite Beta in the presence of an anionic surfactant AESA

Wenming Hao,\*† Lei Zhang,† Jinghong Ma\* and Ruifeng Li

*College of Chemical Engineering and Technology, Taiyuan University of Technology,  
Taiyuan, 030024, P.R. China*

† These authors contributed to this work equally

## Figures

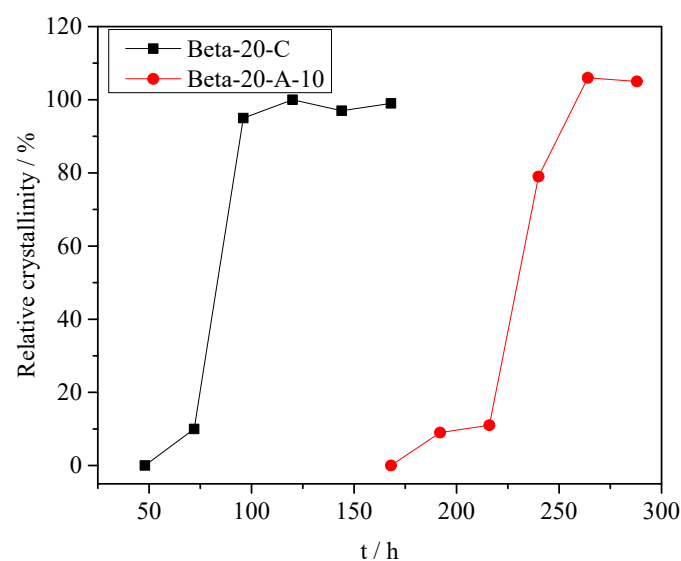

**Figure S1** Crystallization Kinetic Curves of Beta-20-C and Beta-20-A-10

Figure S1 shows the crystallization kinetic curve of zeolite Beta synthesized with the addition of AESA, compared with that synthesized without AESA. Without AESA, the crystallization of zeolite Beta started from 72 hours of hydrothermal treatment. The crystals grew very fast, and the crystallization finished after 96 hours. By contrast, the crystallization of zeolite Beta with AESA needs longer induction period compared

with the conventional synthesis. During the induction period, the peak intensities of XRD patterns slightly increased until 216 hours of hydrothermal treatment. The crystallization was going fast afterwards, and the crystals stop growing after 264 hours of synthesis. It is clear that the addition of AESA changed the crystallization kinetic and increased the induction period.

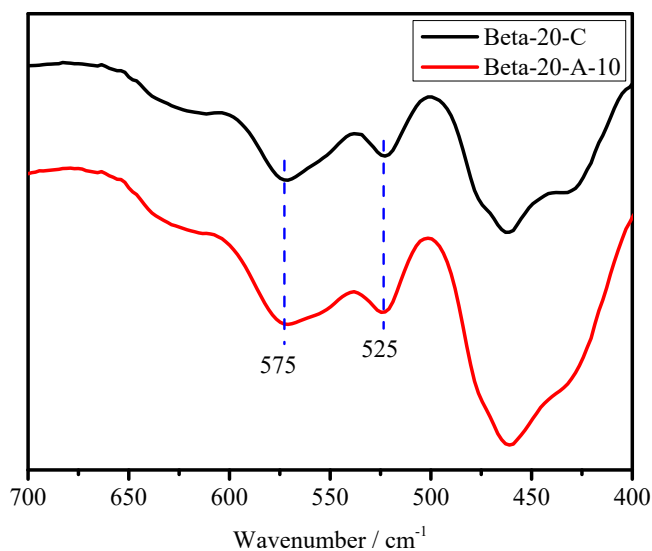

**Figure S2** FT-IR spectra of Beta-20-C and Beta-20-A-10

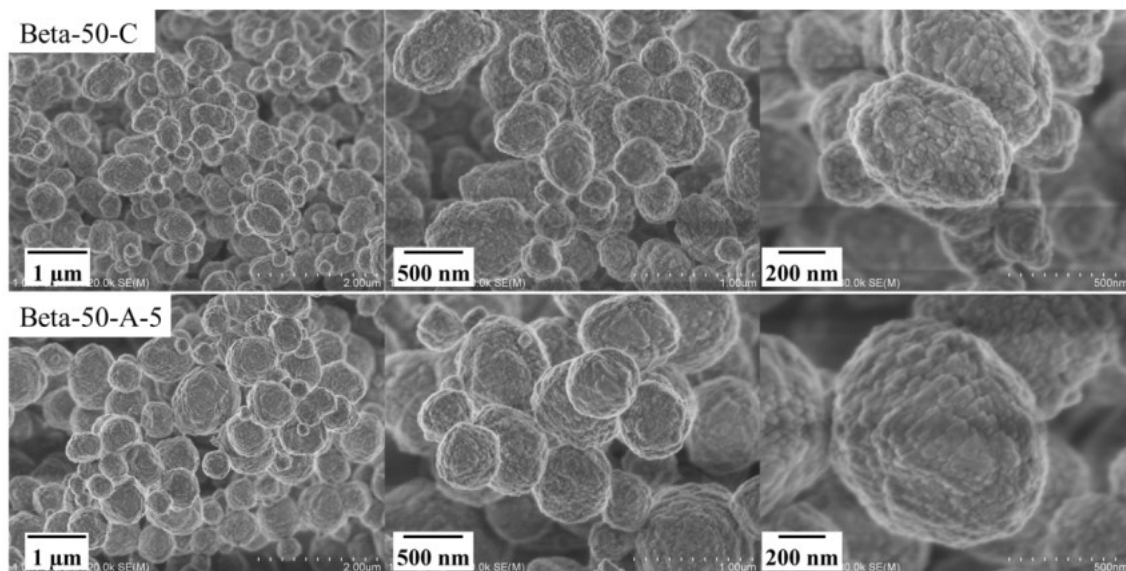

**Figure S3** SEM images of Beta-50-C and Beta-50-A-5

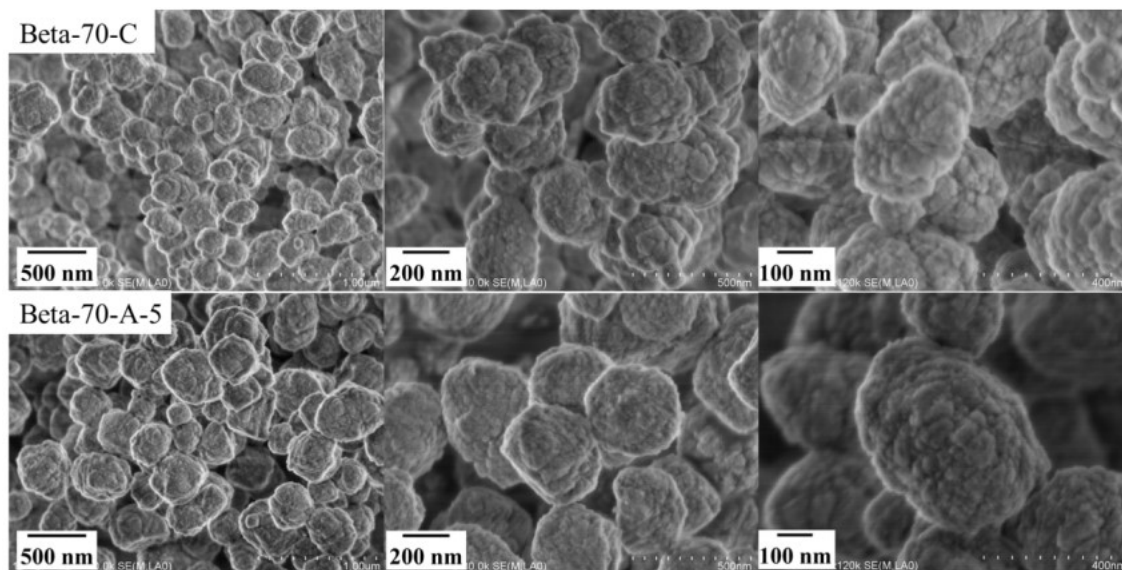

**Figure S4** SEM images of Beta-70-C and Beta-70-A-5

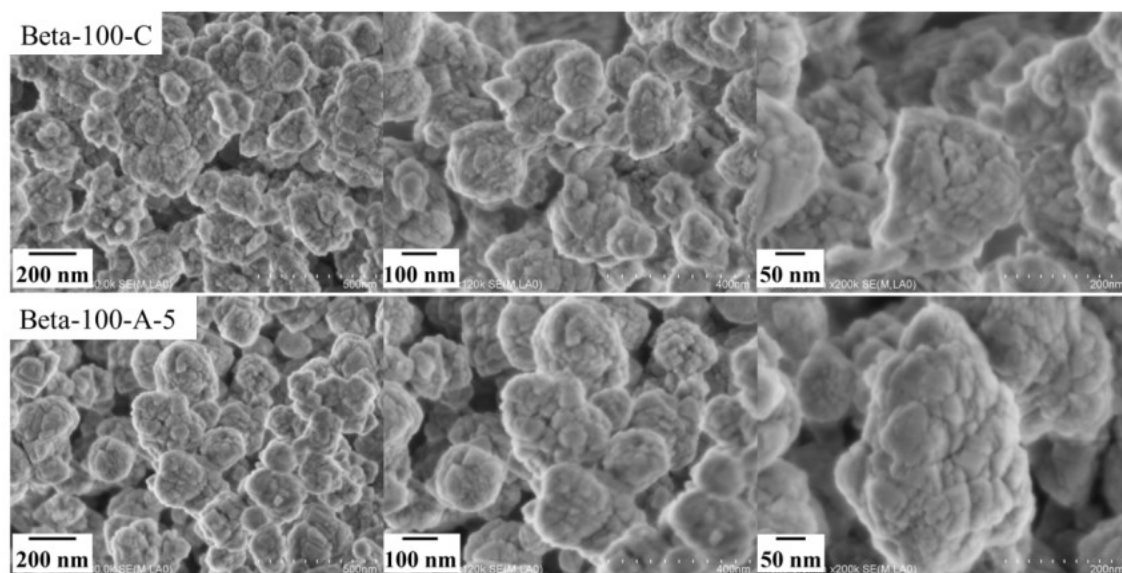

**Figure S5** SEM images of Beta-100-C and Beta-100-A-5

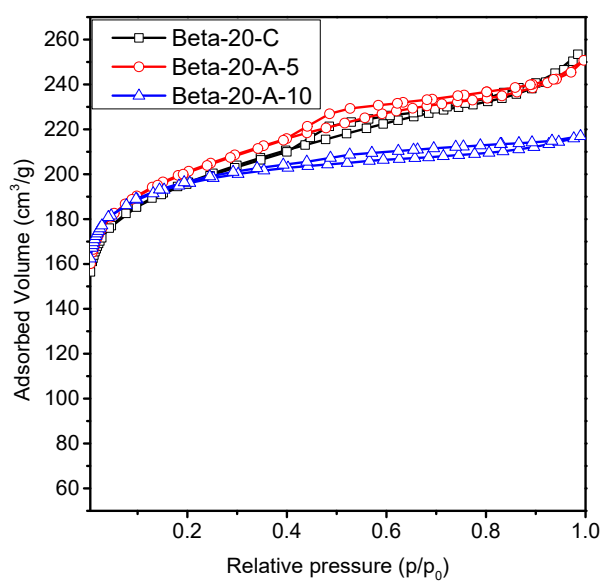

**Figure S6** N<sub>2</sub> adsorption-desorption isotherms of Beta-20-C, Beta-20-A-5 and Beta-20-A-10

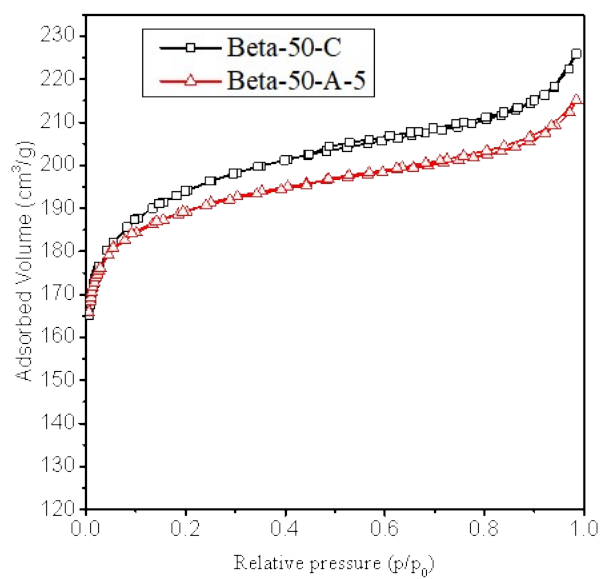

**Figure S7** N<sub>2</sub> adsorption-desorption isotherms of Beta-50-C and Beta-50-A-5

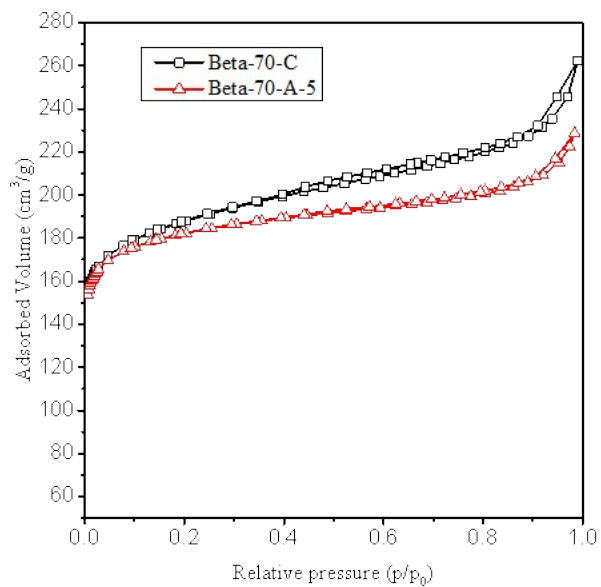

**Figure S8** N<sub>2</sub> adsorption-desorption isotherms of Beta-70-C and Beta-70-A-5

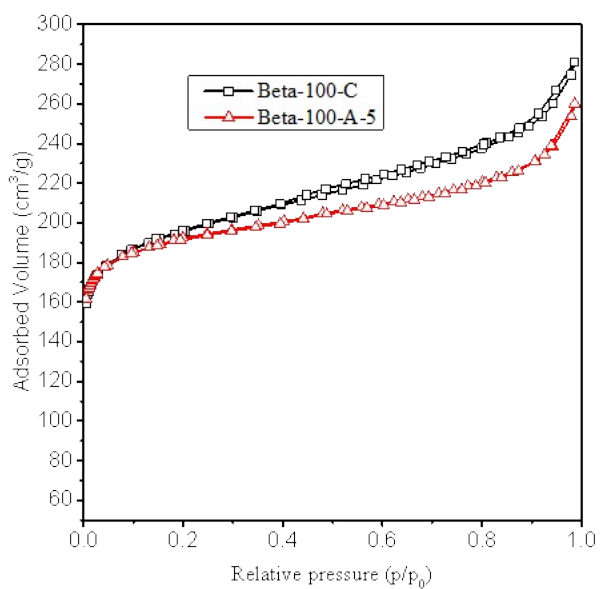

**Figure S9** N<sub>2</sub> adsorption-desorption isotherms of Beta-100-C and Beta-100-A-5

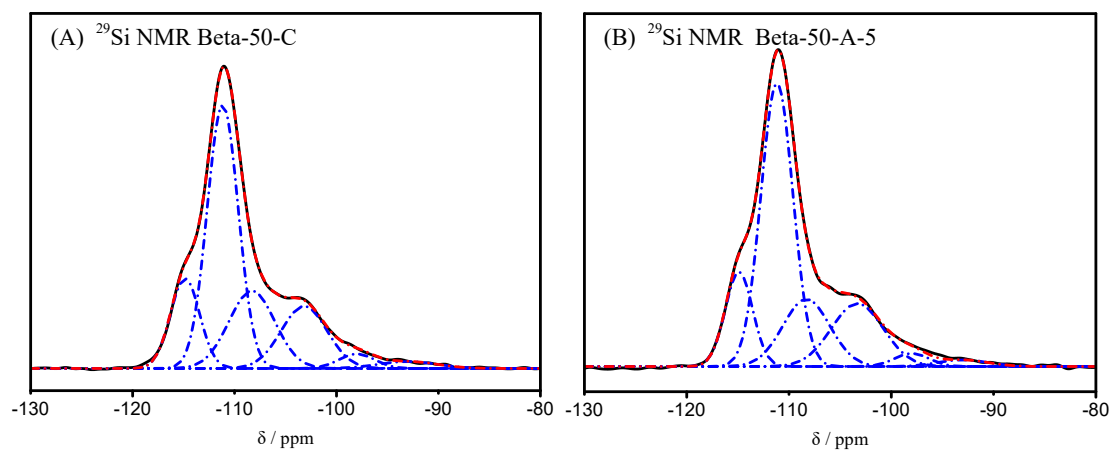

**Figure S10**  $^{29}\text{Si}$  and  $^{27}\text{Al}$  MAS NMR spectra of the Beta-50-C and Beta-50-A-5

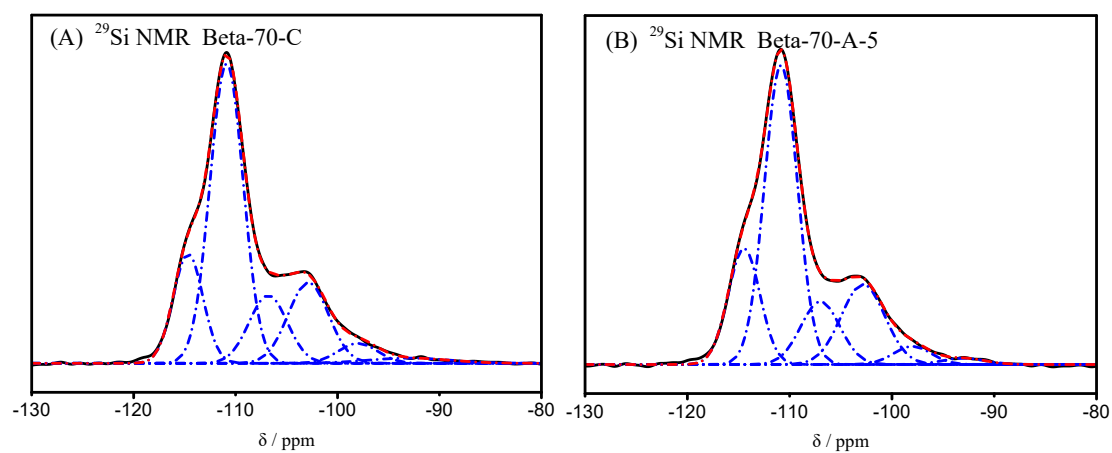

**Figure S11**  $^{29}\text{Si}$  and  $^{27}\text{Al}$  MAS NMR spectra of the Beta-70-C and Beta-70-A-5

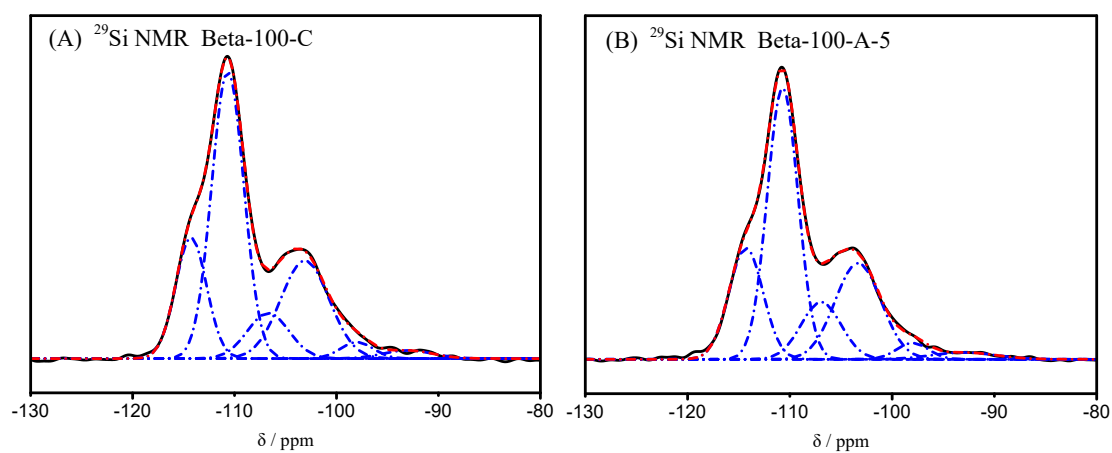

**Figure S12**  $^{29}\text{Si}$  and  $^{27}\text{Al}$  MAS NMR spectra of the Beta-100-C and Beta-100-A-5
